# Supplementary material for: Mitapivat, a pyruvate kinase activator, improves transfusion burden and reduces iron overload in β-thalassemic mice
Source: PubMed Central journal article supplement — Haematologica. 2023 Feb 16;108(9):2535–41. doi: 10.3324/haematol.2022.282614 (PMC10483370; doi:10.3324/haematol.2022.282614), 2023-02-16
Supplement: 2022_282614_MATTE_SUPPL.pdf [file 2022_282614_MATTE_SUPPL.pdf]

# Mitapivat, a pyruvate kinase activator, improves transfusion burden and reduces iron overload in $\beta$ -thalassemic mice

Alessandro Mattè,<sup>1</sup> Penelope A. Kosinski,<sup>2</sup> Enrica Federti,<sup>1</sup> Lenny Dang,<sup>2</sup> Antonio Recchiuti,<sup>3</sup> Roberta Russo,<sup>4</sup> Angela Siciliano,<sup>1</sup> Veronica Riccardi,<sup>1</sup> Anne Janin,<sup>5</sup> Matteo Mucci,<sup>3</sup> Christophe Leboeuf,<sup>5</sup> Achille Iolascon,<sup>6</sup> Carlo Brugnara<sup>7</sup> and Lucia De Franceschi<sup>1</sup>

<sup>1</sup>University of Verona and AOUI Verona, Verona, Italy; <sup>2</sup>Agios Pharmaceuticals, Inc., Cambridge, MA, USA; <sup>3</sup>Department of Medical, Oral and Biotechnology Science, “G. d’Annunzio” University of Chieti, Chieti, Italy; <sup>4</sup>Dipartimento di Medicina Molecolare e Biotecnologie Mediche, Università degli Studi di Napoli Federico II, Naples, Italy; <sup>5</sup>University Diderot of Paris, Paris, France; <sup>6</sup>CEINGE - Biotecnologie Avanzate Franco Salvatore, Naples, Italy and <sup>7</sup>Department of Laboratory Medicine, Harvard Medical School, Boston Children’s Hospital, Boston, MA, USA

Correspondence:

L. DE FRANCESCHI - lucia.defranceschi@univr.it

<https://doi.org/10.3324/haematol.2022.282614>

## SUPPLEMENTARY FIGURES

Figure 1S

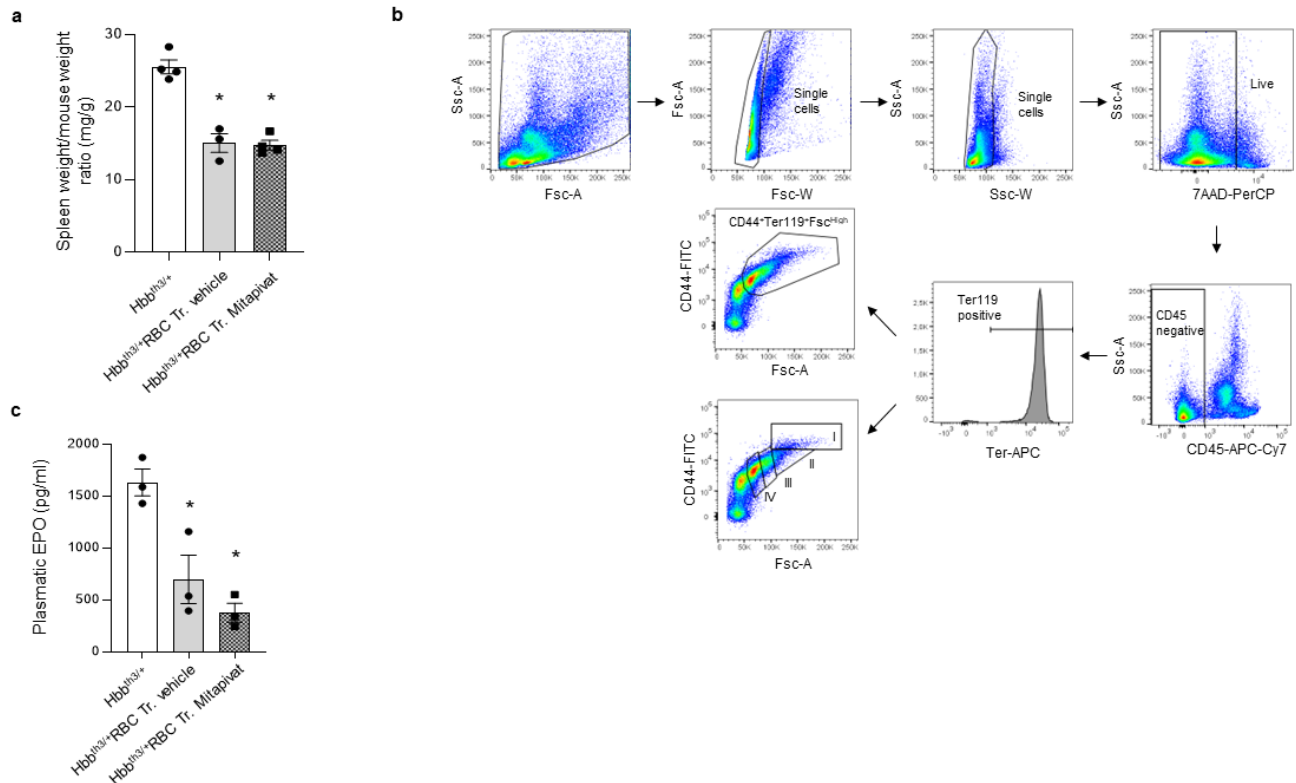

**Figure 1S. a.** Spleen weight to mouse weight ratio in Hbb<sup>th3/+</sup> mice treated with vehicle or exposed to chronic transfusion with or without mitapivat. Data are mean ± SEM ( $n=3-4$ ). \* $P < 0.05$  compared with vehicle Hbb<sup>th3/+</sup> mice and \* $P < 0.05$  compared with vehicle-treated transfused Hbb<sup>th3/+</sup> mice. **b.** Plasma erythropoietin (EPO) levels in Hbb<sup>th3/+</sup> mice treated with vehicle or exposed to chronic transfusion with or without mitapivat. Data are mean ± SEM ( $n=3-4$ ). \* $P < 0.05$  compared with vehicle Hbb<sup>th3/+</sup> mice. **c.** Typical flow cytometric gating strategy used to analyze erythropoietic activity and the maturation index in the bone marrow and in the spleen of Hbb<sup>th3/+</sup> mice exposed to chronic transfusion with or without mitapivat. The following antibodies were used: anti-CD16/CD32 blocking agent, anti-CD44-FITC, CD71-PE, Ter119-APC, CD45 APC-eFluor 780, GR1 APC-Cy7, and CD11b APC-Cy7 (all from eBiosciences, Thermo Fisher Scientific, USA). Analysis was performed with FlowJo software version 10 (BD Biosciences, USA).

Figure 2S

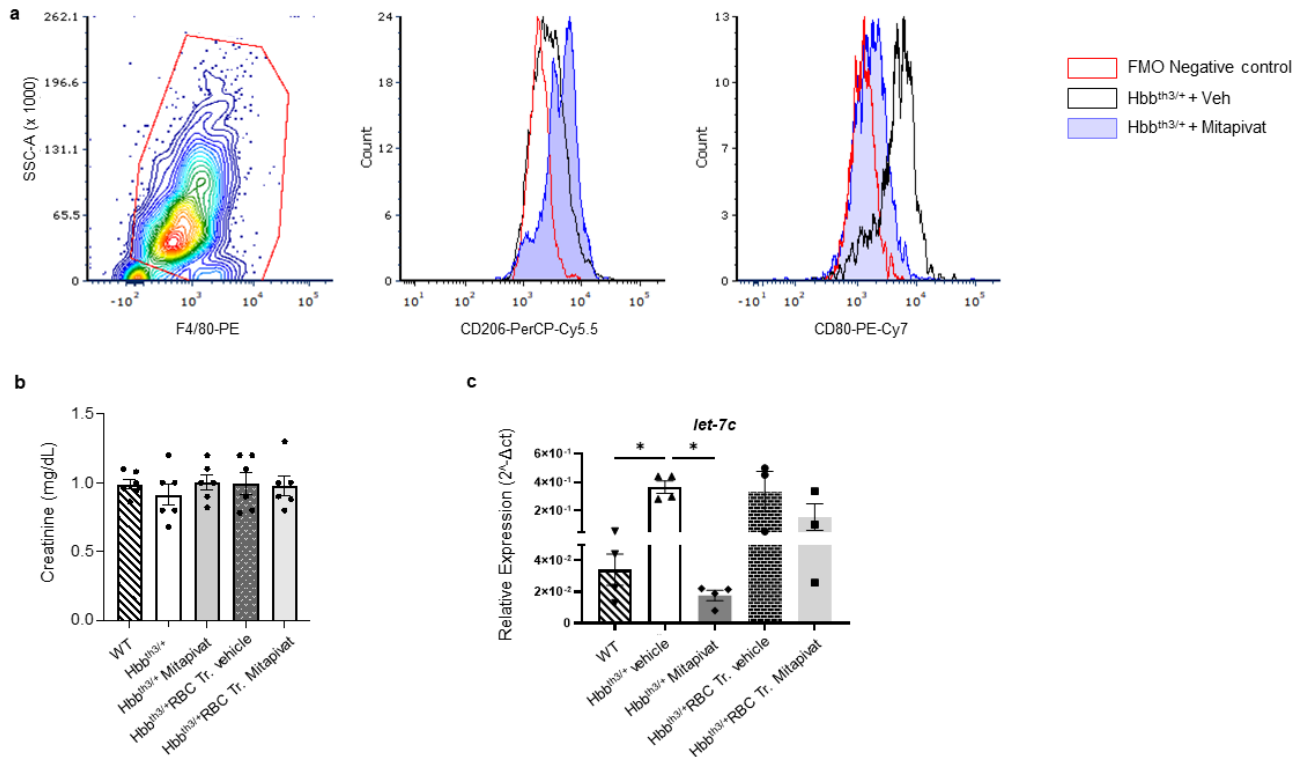

**Figure 2S. a.** Cytofluorimetric quantification strategy of M1 (CD80) and M2 (CD206) expression on spleen MΦ cell surface from wild-type (WT) or Hbb<sup>th3/+</sup> mice exposed to either vehicle or to chronic transfusion with and without mitapivat treatment. Data are mean ± SEM (n=3-4). MFI, mean fluorescence intensity. **b.** Plasma creatinine in WT, Hbb<sup>th3/+</sup> mice with or without mitapivat, Hbb<sup>th3/+</sup> exposed to transfusion with or without mitapivat. Data are mean ± SEM (n=3-4). **c.** Real time PCR analysis of *let-7b* and *-7d* relative expression (using the ΔCt method following normalization of cDNA input using RNU-6) in kidneys from WT or Hbb<sup>th3/+</sup> mice exposed to either vehicle or to chronic transfusion with and without mitapivat treatment determined with real time PCR. Data are mean ± SEM (n=3-4). \* *P* < 0.01.

**Figure 3S**

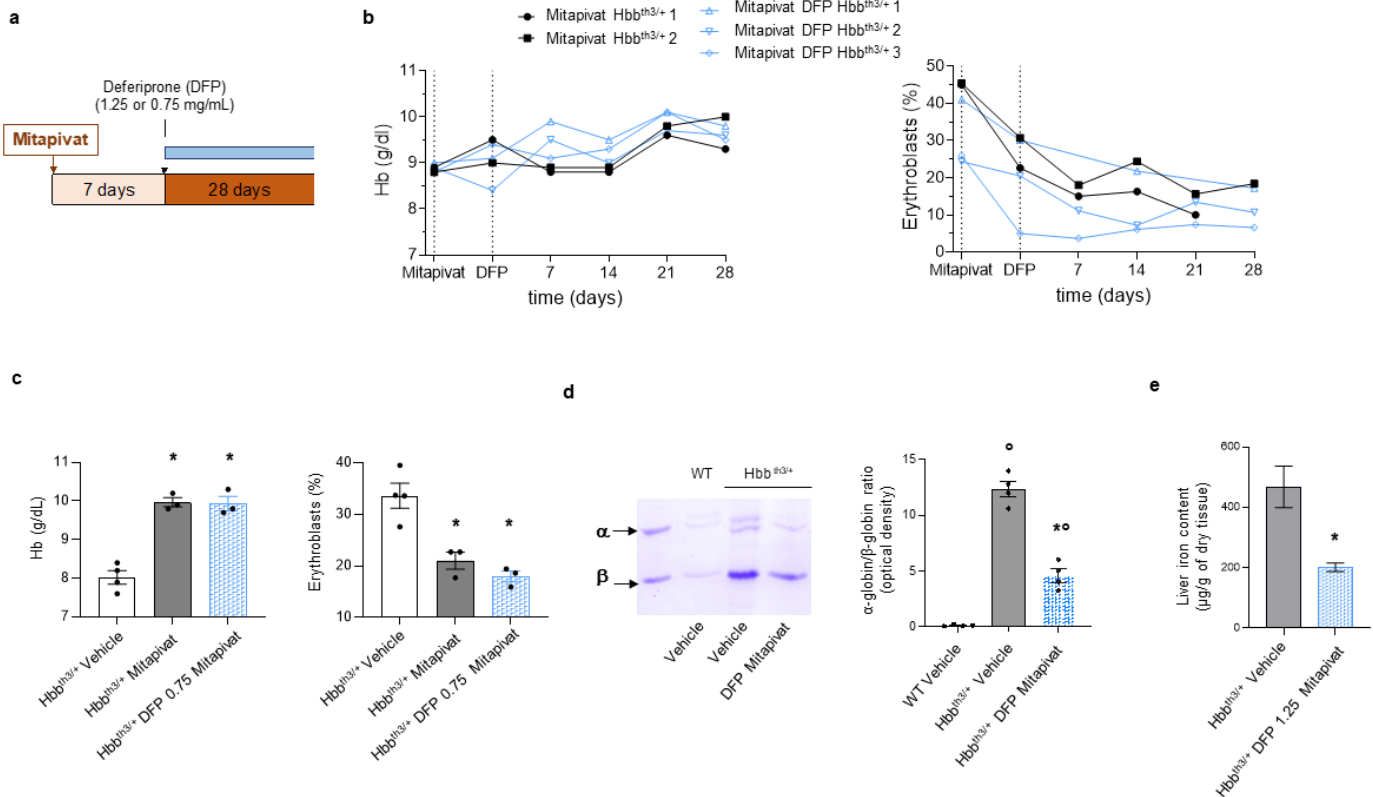

**Figure 3S. a.** Experimental study design to assess the effects of mitapivat on hematologic phenotype of  $\beta$ -thal mice treated DFP, an oral iron chelator. **b.** Hemoglobin (Hb, left panel) and circulating erythroblasts (right panel) in  $Hbb^{th3/+}$  mice treated with mitapivat or mitapivat plus DFP (1.25 mg/mL). Data are shown as single animals (mitapivat  $Hbb^{th3/+}$   $n=2$ ; mitapivat plus DFP  $n=4$ ). **c.** Hemoglobin (Hb, left panel) and circulating erythroblasts (right panel) in  $Hbb^{th3/+}$  mice treated with mitapivat or mitapivat plus DFP (0.75 mg/mL). \* $P < 0.05$  compared with vehicle  $Hbb^{th3/+}$  mice. **d.** Triton acid-urea gel electrophoresis (left panel) of red cell membrane from WT and  $Hbb^{th3/+}$  mice treated with vehicle or mitapivat plus DFP. Arrows show  $\alpha$ -globin and  $\beta$ -globin associated with red cell membrane. Right panel: Gel quantification expressed as  $\alpha$ -globin to  $\beta$ -globin ratio to hemoglobin. Data are mean  $\pm$  SEM ( $n=4$ ); \* $P < 0.05$  compared with vehicle  $Hbb^{th3/+}$  mice;  $^{\circ}P < 0.05$  compared to WT. **e.** Liver iron concentration (LIC) in  $Hbb^{th3/+}$  mice treated with either vehicle or DFP 1.25 mg/mL plus mitapivat. Data are mean  $\pm$  SEM ( $n=4-3$ ). \* $P < 0.05$  compared with vehicle  $Hbb^{th3/+}$  mice.
